# Supplementary material for: A Combined Experimental and Computational (DFT, RDF, MC and MD) Investigation of Epoxy Resin as a Potential Corrosion Inhibitor for Mild Steel in a 0.5 M H2SO4 Environment
Source: MDPI journal article supplement (doi:10.3390/polym15081967), 2023-04-21
Supplement: s1 [file s1]

**A combined experimental and computational (DFT, RDF, MC and MD) investigation of epoxy resin as a potential corrosion inhibition for mild steel in 0.5 M H<sub>2</sub>SO<sub>4</sub> environment**

**Rachid Hsissou<sup>1,2\*</sup>, Khadija Dahmani<sup>2</sup>, Anouar El Magri<sup>3</sup>, Abdelfettah Hmada<sup>4</sup>, Zaki Safi<sup>5</sup>, Nadia Dkhireche<sup>4</sup>, Mouhsine Galai<sup>4</sup>, Nuha Wazzan<sup>6</sup>, Avni Berisha<sup>7</sup>**

<sup>1</sup> Laboratory of Organic Chemistry, Bioorganic and Environment, Chemistry Department, Faculty of Sciences, Chouaib Doukkali University, El Jadida, Morocco.

<sup>2</sup> Laboratory of Organic Chemistry, Catalysis and Environment, Department of Chemistry, Faculty of Sciences, Ibn Tofail University, BP 242, 14000, Kenitra, Morocco.

<sup>3</sup> Euromed Polytechnic School, Euromed Research Center, Euromed University of Fez, 30 000, Fez, Morocco.

<sup>4</sup> Laboratory of Advanced Materials and Process Engineering, Faculty of Sciences, Ibn Tofail University, BP 242, 14000 Kenitra, Morocco.

<sup>5</sup> Al Azhar University-Gaza, Chemistry Department, Faculty of Science, P.O Box 1277, Gaza, Palestine.

<sup>6</sup> King Abdulaziz University, Chemistry Department, Faculty of Science, P.O Box 42805, Jeddah, 21589, Saudi Arabia.

<sup>7</sup> Department of Chemistry, Faculty of Natural and Mathematics Science, University of Prishtina, 10000 Prishtina, Kosovo

**Corresponding author:** Rachid Hsissou Email: r.hsissou@gmail.com

## Supporting information

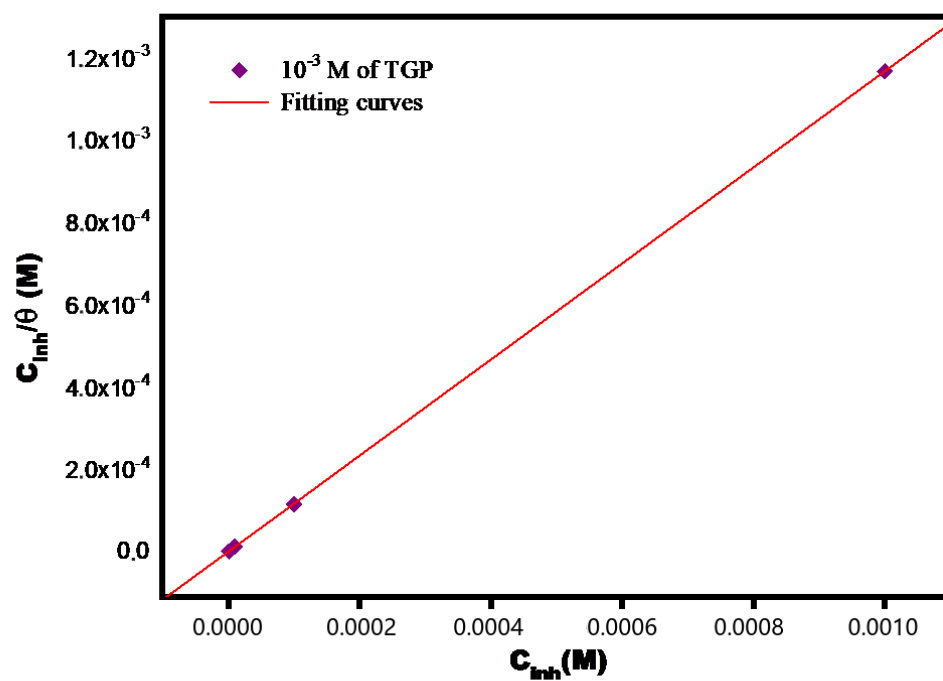

**Figure. S1.** Langmuir adsorption isotherm model of TGP for MS in 0.5 M  $H_2SO_4$  at 298 K

**Table S1.** Hirshfeld charges, condensed Fukui functions and condensed dual descriptors for the neutral form of the TGP inhibitor molecules as obtained at the B3LYP/6-31G(d,p)/H<sub>2</sub>O/PCM model of theory. Units used below are "e" (elementary charge)

| atom |                |                  |                  | $f_k^+$ | $f_k^-$ | $f_k^2$ | $s_k^+$ | $s_k^-$ | $\Delta s_k$ | $w_k^+$ | $w_k^-$ | $\Delta w_k$ |
|------|----------------|------------------|------------------|---------|---------|---------|---------|---------|--------------|---------|---------|--------------|
| s    | q <sub>N</sub> | q <sub>N+1</sub> | q <sub>N-1</sub> |         |         |         |         |         |              |         |         |              |
| C1   | 0.1513         | -                | 0.1993           | 0.294   | 0.048   |         | 0.108   | 0.017   |              | 0.971   | 0.158   |              |
|      |                |                  |                  | 5       | 0       | 0.2465  | 4       | 7       | 0.0907       | 6       | 4       | 0.8132       |
| C2   | 0.0502         | 0.0090           | 0.0776           | 0.041   | 0.027   |         | 0.015   | 0.010   |              | 0.135   | 0.090   |              |
|      |                |                  |                  | 2       | 4       | 0.0138  | 2       | 1       | 0.0051       | 9       | 4       | 0.0455       |
| C3   | 0.0552         | 0.0478           | 0.0757           | 0.007   | 0.020   | -       | 0.002   | 0.007   | -            | 0.024   | 0.067   | -            |
|      |                |                  |                  | 4       | 5       | 0.0131  | 7       | 5       | 0.0048       | 4       | 6       | 0.0432       |
| C4   | 0.0511         | 0.0463           | 0.0738           | 0.004   | 0.022   | -       | 0.001   | 0.008   | -            | 0.016   | 0.074   | -            |
|      |                |                  |                  | 9       | 7       | 0.0178  | 8       | 4       | 0.0066       | 2       | 9       | 0.0587       |
| C5   | 0.0180         | 0.0151           | 0.0439           | 0.002   | 0.025   | -       | 0.001   | 0.009   | -            | 0.009   | 0.085   | -            |
|      |                |                  |                  | 8       | 9       | 0.0231  | 0       | 5       | 0.0085       | 2       | 4       | 0.0762       |
| C6   | 0.0283         | 0.0270           | 0.0401           | 0.001   | 0.011   | -       | 0.000   | 0.004   | -            | 0.004   | 0.038   | -            |
|      |                |                  |                  | 2       | 8       | 0.0106  | 4       | 3       | 0.0039       | 0       | 9       | 0.0350       |
| C7   | 0.0363         | 0.0360           | 0.0393           | 0.000   | 0.003   | -       | 0.000   | 0.001   | -            | 0.001   | 0.009   | -            |
|      |                |                  |                  | 3       | 0       | 0.0027  | 1       | 1       | 0.0010       | 0       | 9       | 0.0089       |
| C8   | 0.0123         | 0.0119           | 0.0164           | 0.000   | 0.004   | -       | 0.000   | 0.001   | -            | 0.001   | 0.013   | -            |
|      |                |                  |                  | 4       | 1       | 0.0037  | 1       | 5       | 0.0014       | 3       | 5       | 0.0122       |
| C9   | 0.0331         | 0.0184           | 0.0471           | 0.014   | 0.014   |         | 0.005   | 0.005   |              | 0.048   | 0.046   |              |
|      |                |                  |                  | 7       | 0       | 0.0007  | 4       | 2       | 0.0003       | 5       | 2       | 0.0023       |
| C10  | 0.0374         | 0.0309           | 0.0404           | 0.006   | 0.003   |         | 0.002   | 0.001   |              | 0.021   | 0.009   |              |
|      |                |                  |                  | 5       | 0       | 0.0035  | 4       | 1       | 0.0013       | 4       | 9       | 0.0115       |
| C11  | 0.0174         | 0.0100           | 0.0239           | 0.007   | 0.006   |         | 0.002   | 0.002   |              | 0.024   | 0.021   |              |
|      |                |                  |                  | 4       | 5       | 0.0009  | 7       | 4       | 0.0003       | 4       | 4       | 0.0030       |
| C12  | 0.0216         | 0.0192           | 0.0439           | 0.002   | 0.022   | -       | 0.000   | 0.008   | -            | 0.007   | 0.073   | -            |
|      |                |                  |                  | 4       | 3       | 0.0199  | 9       | 2       | 0.0073       | 9       | 6       | 0.0657       |
| C13  | 0.0339         | 0.0327           | 0.0387           | 0.001   | 0.004   | -       | 0.000   | 0.001   | -            | 0.004   | 0.016   | -            |
|      |                |                  |                  | 2       | 9       | 0.0037  | 4       | 8       | 0.0014       | 0       | 2       | 0.0122       |
| C14  | 0.0104         | 0.0093           | 0.0179           | 0.001   | 0.007   | -       | 0.000   | 0.002   | -            | 0.004   | 0.024   | -            |
|      |                |                  |                  | 2       | 5       | 0.0063  | 4       | 8       | 0.0023       | 0       | 7       | 0.0208       |
| C15  | 0.0279         | 0.0223           | 0.0420           | 0.005   | 0.014   | -       | 0.002   | 0.005   | -            | 0.018   | 0.046   | -            |
|      |                |                  |                  | 6       | 1       | 0.0085  | 1       | 2       | 0.0031       | 5       | 5       | 0.0280       |
| C16  | 0.0356         | 0.0334           | 0.0391           | 0.002   | 0.003   | -       | 0.000   | 0.001   | -            | 0.007   | 0.011   | -            |
|      |                |                  |                  | 2       | 5       | 0.0013  | 8       | 3       | 0.0005       | 3       | 5       | 0.0043       |
| C17  | 0.0121         | 0.0093           | 0.0178           | 0.002   | 0.005   | -       | 0.001   | 0.002   | -            | 0.009   | 0.018   | -            |
|      |                |                  |                  | 8       | 7       | 0.0029  | 0       | 1       | 0.0011       | 2       | 8       | 0.0096       |
| O18  | 0.2482         | 0.4921           | 0.1539           | 0.243   | 0.094   |         | 0.089   | 0.034   |              | 0.804   | 0.310   |              |
|      |                |                  |                  | 9       | 2       | 0.1497  | 8       | 7       | 0.0551       | 6       | 8       | 0.4939       |
| O19  | 0.1591         | 0.1951           | 0.1033           | 0.036   | 0.055   | -       | 0.013   | 0.020   | -            | 0.118   | 0.184   | -            |
|      |                |                  |                  | 0       | 8       | 0.0198  | 2       | 5       | 0.0073       | 8       | 1       | 0.0653       |
| O20  | 0.1594         | 0.1649           | 0.0916           | 0.005   | 0.067   | -       | 0.002   | 0.025   | -            | 0.018   | 0.223   | -            |
|      |                |                  |                  | 5       | 8       | 0.0623  | 0       | 0       | 0.0229       | 1       | 7       | 0.2055       |
| O21  | 0.1726         | 0.1753           | 0.0772           | 0.002   | 0.095   | -       | 0.001   | 0.035   | -            | 0.008   | 0.314   | -            |
|      |                |                  |                  | 6       | 4       | 0.0928  | 0       | 1       | 0.0342       | 6       | 7       | 0.3061       |
| O22  | 0.1647         | 0.1666           | 0.1250           | 0.001   | 0.039   | -       | 0.000   | 0.014   | -            | 0.006   | 0.130   | -            |
|      |                |                  |                  | 9       | 6       | 0.0377  | 7       | 6       | 0.0139       | 3       | 6       | 0.1244       |
| O23  | 0.2252         | 0.2365           | 0.2183           | 0.011   | 0.006   |         | 0.004   | 0.002   |              | 0.037   | 0.022   |              |
|      |                |                  |                  | 3       | 9       | 0.0044  | 2       | 5       | 0.0016       | 3       | 8       | 0.0145       |
| O24  | 0.2256         | 0.2275           | 0.2144           | 0.001   | 0.011   | -       | 0.000   | 0.004   | -            | 0.005   | 0.037   | -            |
|      |                |                  |                  | 8       | 3       | 0.0095  | 7       | 2       | 0.0035       | 9       | 3       | 0.0313       |
| O25  | 0.2243         | 0.2251           | 0.2168           | 0.000   | 0.007   | -       | 0.000   | 0.002   | -            | 0.002   | 0.024   | -            |
|      |                |                  |                  | 8       | 5       | 0.0067  | 3       | 8       | 0.0025       | 6       | 7       | 0.0221       |
| O26  | 0.2229         | 0.2269           | 0.2138           | 0.003   | 0.009   | -       | 0.001   | 0.003   | -            | 0.012   | 0.030   | -            |
|      |                |                  |                  | 9       | 1       | 0.0052  | 4       | 3       | 0.0019       | 9       | 0       | 0.0172       |

**Table S2.** Hirshfeld charges, condensed Fukui functions and condensed dual descriptors for the protonated form of the TGP inhibitor molecules as obtained at the B3LYP/6-31G(d,p)/H<sub>2</sub>O/PCM model of theory. Units used below are "e" (elementary charge)

| atom |                |                  |                  | $f_k^+$ | $f_k^-$ | $f_k^2$ | $s_k^+$ | $s_k^-$ | $\Delta s_k$ | $w_k^+$ | $w_k^-$ | $\Delta w_k$ |
|------|----------------|------------------|------------------|---------|---------|---------|---------|---------|--------------|---------|---------|--------------|
| s    | q <sub>N</sub> | q <sub>N+1</sub> | q <sub>N-1</sub> |         |         |         |         |         |              |         |         |              |
| C1   | 0.1478         | -                | 0.1965           | 0.295   | 0.048   |         | 0.108   | 0.017   |              | 0.352   | 0.058   |              |
|      |                |                  |                  | 6       | 7       | 0.2469  | 2       | 8       | 0.0904       | 2       | 0       | 0.2941       |
|      |                |                  |                  | 0.041   | 0.026   |         | 0.015   | 0.009   |              | 0.049   | 0.031   |              |
| C2   | 0.0511         | 0.0093           | 0.0778           | 8       | 7       | 0.0151  | 3       | 8       | 0.0055       | 8       | 8       | 0.0180       |
|      |                |                  |                  | 0.005   | 0.020   | -       | 0.002   | 0.007   | -            | 0.006   | 0.024   | -            |
| C3   | 0.0509         | 0.0450           | 0.0714           | 8       | 6       | 0.0148  | 1       | 5       | 0.0054       | 9       | 5       | 0.0176       |
|      |                |                  |                  | 0.004   | 0.022   | -       | 0.001   | 0.008   | -            | 0.004   | 0.026   | -            |
| C4   | 0.0470         | 0.0429           | 0.0696           | 1       | 6       | 0.0185  | 5       | 3       | 0.0068       | 9       | 9       | 0.0220       |
|      |                |                  |                  | 0.002   | 0.019   | -       | 0.000   | 0.007   | -            | 0.002   | 0.023   | -            |
| C5   | 0.0169         | 0.0144           | 0.0365           | 4       | 6       | 0.0172  | 9       | 2       | 0.0063       | 9       | 4       | 0.0205       |
|      |                |                  |                  | 0.002   | 0.021   | -       | 0.000   | 0.007   | -            | 0.002   | 0.025   | -            |
| C6   | 0.0148         | 0.0126           | 0.0361           | 2       | 2       | 0.0190  | 8       | 8       | 0.0070       | 6       | 3       | 0.0226       |
|      |                |                  |                  | 0.000   | 0.005   | -       | 0.000   | 0.002   | -            | 0.001   | 0.006   | -            |
| C7   | 0.0500         | 0.0492           | 0.0555           | 8       | 5       | 0.0047  | 3       | 0       | 0.0017       | 0       | 6       | 0.0056       |
|      |                |                  |                  | 0.000   | 0.004   | -       | 0.000   | 0.001   | -            | 0.000   | 0.004   | -            |
| C8   | 0.0248         | 0.0242           | 0.0289           | 6       | 1       | 0.0035  | 2       | 5       | 0.0013       | 7       | 9       | 0.0042       |
|      |                |                  |                  | 0.014   | 0.012   |         | 0.005   | 0.004   |              | 0.017   | 0.014   |              |
| C9   | 0.0309         | 0.0166           | 0.0429           | 3       | 0       | 0.0023  | 2       | 4       | 0.0008       | 0       | 3       | 0.0027       |
|      |                |                  |                  | 0.005   | 0.003   |         | 0.002   | 0.001   |              | 0.007   | 0.004   |              |
| C10  | 0.0473         | 0.0414           | 0.0508           | 9       | 5       | 0.0024  | 2       | 3       | 0.0009       | 0       | 2       | 0.0029       |
|      |                |                  |                  | 0.003   | 0.002   |         | 0.001   | 0.001   |              | 0.003   | 0.003   |              |
| C11  | 0.0283         | 0.0249           | 0.0310           | 3       | 7       | 0.0006  | 2       | 0       | 0.0002       | 9       | 2       | 0.0007       |
|      |                |                  |                  | 0.001   | 0.010   | -       | 0.000   | 0.004   | -            | 0.001   | 0.013   | -            |
| C12  | 0.0193         | 0.0181           | 0.0302           | 2       | 9       | 0.0097  | 4       | 0       | 0.0036       | 4       | 0       | 0.0116       |
|      |                |                  |                  | 0.000   | 0.002   | -       | 0.000   | 0.001   | -            | 0.000   | 0.003   | -            |
| C13  | 0.0504         | 0.0499           | 0.0533           | 4       | 9       | 0.0025  | 1       | 1       | 0.0009       | 5       | 5       | 0.0030       |
|      |                |                  |                  | 0.000   | 0.002   | -       | 0.000   | 0.001   | -            | 0.000   | 0.003   | -            |
| C14  | 0.0234         | 0.0231           | 0.0260           | 3       | 6       | 0.0023  | 1       | 0       | 0.0008       | 4       | 1       | 0.0027       |
|      |                |                  |                  | 0.004   | 0.014   | -       | 0.001   | 0.005   | -            | 0.005   | 0.017   | -            |
| C15  | 0.0189         | 0.0141           | 0.0335           | 8       | 6       | 0.0098  | 8       | 3       | 0.0036       | 7       | 4       | 0.0117       |
|      |                |                  |                  | 0.001   | 0.004   | -       | 0.000   | 0.001   | -            | 0.002   | 0.005   | -            |
| C16  | 0.0522         | 0.0503           | 0.0567           | 9       | 5       | 0.0026  | 7       | 6       | 0.0010       | 3       | 4       | 0.0031       |
|      |                |                  |                  | 0.001   | 0.002   | -       | 0.000   | 0.000   | -            | 0.001   | 0.002   | -            |
| C17  | 0.0185         | 0.0175           | 0.0209           | 0       | 4       | 0.0014  | 4       | 9       | 0.0005       | 2       | 9       | 0.0017       |
|      | -              | -                | -                | 0.248   | 0.099   |         | 0.091   | 0.036   |              | 0.296   | 0.118   |              |
| O18  | 0.2585         | 0.5071           | 0.1590           | 5       | 5       | 0.1490  | 0       | 4       | 0.0545       | 0       | 5       | 0.1775       |
|      | -              | -                | -                | 0.038   | 0.052   | -       | 0.014   | 0.019   | -            | 0.046   | 0.062   | -            |
| O19  | 0.1572         | 0.1961           | 0.1051           | 9       | 1       | 0.0132  | 2       | 1       | 0.0048       | 3       | 1       | 0.0157       |
|      | -              | -                | -                | 0.004   | 0.066   | -       | 0.001   | 0.024   | -            | 0.005   | 0.079   | -            |
| O20  | 0.1599         | 0.1641           | 0.0932           | 2       | 7       | 0.0625  | 5       | 4       | 0.0229       | 0       | 5       | 0.0745       |
|      | -              | -                | -                | 0.002   | 0.041   | -       | 0.000   | 0.015   | -            | 0.002   | 0.049   | -            |
| O21  | 0.1694         | 0.1718           | 0.1282           | 4       | 2       | 0.0388  | 9       | 1       | 0.0142       | 9       | 1       | 0.0462       |
|      | -              | -                | -                | 0.003   | 0.083   | -       | 0.001   | 0.030   | -            | 0.004   | 0.098   | -            |
| O22  | 0.1678         | 0.1713           | 0.0849           | 5       | 0       | 0.0795  | 3       | 4       | 0.0291       | 2       | 9       | 0.0947       |
|      | -              | -                | -                | 0.008   | 0.005   |         | 0.002   | 0.002   |              | 0.009   | 0.006   |              |
| O23  | 0.2596         | 0.2677           | 0.2539           | 0       | 7       | 0.0023  | 9       | 1       | 0.0008       | 5       | 8       | 0.0027       |
|      | -              | -                | -                | 0.000   | 0.002   | -       | 0.000   | 0.000   | -            | 0.000   | 0.002   | -            |
| O24  | 0.2440         | 0.2441           | 0.2418           | 1       | 1       | 0.0020  | 0       | 8       | 0.0007       | 1       | 5       | 0.0024       |
|      | -              | -                | -                | 0.000   | 0.002   | -       | 0.000   | 0.001   | -            | 0.000   | 0.003   | -            |
| O25  | 0.2491         | 0.2493           | 0.2464           | 3       | 7       | 0.0024  | 1       | 0       | 0.0009       | 4       | 2       | 0.0029       |
|      | -              | -                | -                | 0.001   | 0.003   | -       | 0.000   | 0.001   | -            | 0.001   | 0.003   | -            |
| O26  | 0.2421         | 0.2431           | 0.2390           | 0       | 2       | 0.0022  | 4       | 2       | 0.0008       | 2       | 8       | 0.0026       |
|      | -              | -                | -                | 0.003   | 0.003   |         | 0.001   | 0.001   |              | 0.003   | 0.003   |              |
| O27  | 0.2315         | 0.2347           | 0.2285           | 1       | 0       | 0.0001  | 1       | 1       | 0.0000       | 7       | 6       | 0.0001       |
|      | -              | -                | -                | 0.000   | 0.004   | -       | 0.000   | 0.001   | -            | 0.000   | 0.005   | -            |
| O28  | 0.2444         | 0.2448           | 0.2397           | 4       | 7       | 0.0043  | 1       | 7       | 0.0016       | 5       | 6       | 0.0051       |
|      | -              | -                | -                | 0.000   | 0.011   | -       | 0.000   | 0.004   | -            | 0.000   | 0.013   | -            |
| O29  | 0.2559         | 0.2564           | 0.2445           | 4       | 4       | 0.0110  | 1       | 2       | 0.0040       | 5       | 6       | 0.0131       |
|      | -              | -                | -                | 0.003   | 0.009   | -       | 0.001   | 0.003   | -            | 0.004   | 0.011   | -            |
| O30  | 0.2490         | 0.2525           | 0.2391           | 5       | 9       | 0.0064  | 3       | 6       | 0.0023       | 2       | 8       | 0.0076       |
